# Supplementary material
Source: publisher site journal article supplement (https://static.cambridge.org/content/id/urn:cambridge.org:id:article:S0376892919000390/resource/name/S0376892919000390supp001.pdf)
Supplement: Supplementary file 1 [file S0376892919000390supp001.pdf]

## SUPPLEMENTARY MATERIAL

### **Annexure S1. Testing the influence of environmental and spatial factors on variation in species composition**

We tested the contribution of environment and pure space to the variation in species composition among all our sampling sites, irrespective of land tenure type, using Redundancy Analyses (RDA) (Rao, 1964). We created a single species abundance matrix, including sacred forest and reserve forest sites, where the sites were rows and individual species abundances were the columns. We excluded two SF sites from this analysis, as they did not have four sampling quadrats, resulting in 8 SF sites and 9 RF sites. The species abundance matrix was Hellinger transformed (henceforth SA matrix) before computing the RDAs (Borcard et al., 2018). We built a corresponding environmental matrix with rows as sites and columns with data on environmental predictors. We also tested for spatial structures in species composition using Principal Coordinate Analyses of Neighbour Matrices (PCNM) analyses (Dray et al., 2006). To do this, we computed the Euclidean distance matrix among the sampling sites and modified the entries in the matrix. Distance values greater than a threshold were given a fixed large value and values below the threshold value were retained as such. The threshold value was determined using the minimum spanning tree algorithm to compute the minimum spatial distance that connected each sampling site to at least one other site. The threshold value is simply four times this distance, and the Euclidean distance matrix was appropriately 'truncated' using this threshold. A Principal Coordinate Analysis of this truncated distance matrix yielded the PCNMs, which we used to test for different scales in spatial structure of species composition (Borcard et al., 2018).

We first tested for spatial trends in species composition by computing an RDA between the SA matrix and the matrix of site locations (XY). Any spatial structure in species composition with a scale larger than the study area would give rise to spatial trends. Next we computed the RDA between SA matrix and the environmental matrix, to test and select the variables with significant influence on species abundance. Finally, we computed the RDA between the SA matrix and the PCNMs to test for spatial structures. These above analyses together enable us to quantify differences in environmental or spatial factors that could explain the variation in species abundances among these sites. Since we chose our study sites within a relatively environmentally homogenous block to specifically tease apart the influence of land use, we did not expect to see significant influence of these environmental or spatial factors. The above analyses were carried out using the 'vegan' package (Oksanen et al., 2018) in R (R Development Core Team, 2011).

Results show that the RDA of the SA matrix with the XY coordinates of the sites was non-significant ( $F = 1.178$ ,  $df_{\text{model}}=2$ ,  $df_{\text{residuals}}=14$ ,  $P=0.245$ ), indicating that there were no significant spatial trends in species abundances among all the sites.

Since there was no significant trend, we did not detrend the SA matrix data in further analyses. The RDA of the SA matrix with a matrix of seven environmental variables (elevation, slope, aspect,

dry months rainfall, annual rainfall, mean monthly temperature, TCI) was non-significant ( $F = 1.05$ ,  $df_{\text{model}}=7$ ,  $df_{\text{residuals}}=9$ ,  $P=0.372$ ), showing no significant explanatory power of these factors on variation in species abundance.

For PCNM analyses we found that 11 of the 16 were positive, so we chose these 11 components and the RDA of the SA matrix with these components was non-significant, showing no detectable spatial structure in species abundances ( $F = 1.131$ ,  $df_{\text{model}}=11$ ,  $df_{\text{residuals}}=5$ ,  $P=0.292$ ).

Borcard D., Gillet F. & Legendre P. (2018) *Numerical Ecology with R*. 2nd ed. New York, NY, USA: Springer

Legendre P., Mi X., Ren H., Ma K., Yu M., Sun I.-F. & He F. (2009) Partitioning beta diversity in a subtropical broad-leaved forest of China. *Ecology* **90**: 663–674

Rao C. R. (1964) The Use and Interpretation of Principal Component Analysis in Applied Research. *Sankhyā: The Indian Journal of Statistics, Series A (1961-2002)* **26**: 329–358

## **Annexure S2. Testing the influence of landuse on species richness, diversity and basal areas**

We use a linear mixed effects model, to test the influence of land tenure (sacred forest or reserve forest) on species richness. Although sacred forest and reserve forest patches are quite distinct land uses, we sampled only a small subset of such sites in the landscape and we expect significant variation within each land tenure category. We, therefore, treated land tenure as a random effects predictor. We built two models, one of which was an intercept-only model another which modelled the influence of land tenure. The models were fitted using maximum likelihood (ML) instead of the usual restricted maximum likelihood (REML) so that we could carry out a Likelihood Ratio Test on the two models to determine statistical significance of the influence of land tenure (variable name below = landuse).

### **(i) Species richness (S)**

```
a <- lmer(SR~1+(1|landuse), data=splu)
b <- lmer(SR~landuse+(1|landuse), data=splu)
```

```
> anova(a,b)
```

```
refitting model(s) with ML (instead of REML)
```

```
Data: splu
```

```
Models:
```

```
a: SR ~ 1 + (1 | landuse)
```

```
b: SR ~ landuse + (1 | landuse)
```

|   | Df | AIC    | BIC    | logLik  | deviance | Chisq  | Chi | Df | Pr(>Chisq) |
|---|----|--------|--------|---------|----------|--------|-----|----|------------|
| a | 3  | 116.28 | 118.78 | -55.143 | 110.28   |        |     |    |            |
| b | 4  | 113.17 | 116.50 | -52.583 | 105.17   | 5.1187 |     | 1  | 0.02367 *  |

```
---
```

```
Signif. codes:  0 '***' 0.001 '**' 0.01 '*' 0.05 '.' 0.1 ' ' 1
```

**(ii) Shannon Diversity (H)**

```
a <- lmer(Shannon~1+(1|landuse), data=diversity.data)
b <- lmer(Shannon~landuse+(1|landuse), data=diversity.data)

> anova(a,b)
refitting model(s) with ML (instead of REML)
Data: diversity.data
Models:
a: Shannon ~ 1 + (1 | landuse)
b: Shannon ~ landuse + (1 | landuse)
  Df      AIC      BIC logLik deviance Chisq Chi Df Pr(>Chisq)
a  3 35.858 38.357 -14.929  29.858
b  4 34.043 37.376 -13.021  26.043 3.8149      1  0.0508 .
---
Signif. codes:  0 '***' 0.001 '**' 0.01 '*' 0.05 '.' 0.1 ' ' 1
```

**(iii) Evenness (H/log(S))**

```
a <- lmer(Evenness~1+(1|landuse), data=diversity.data)
b <- lmer(Evenness~landuse+(1|landuse), data=diversity.data)

> anova(a,b)
refitting model(s) with ML (instead of REML)
Data: diversity.data
Models:
a: Evenness ~ 1 + (1 | landuse)
b: Evenness ~ landuse + (1 | landuse)
  Df      AIC      BIC logLik deviance Chisq Chi Df Pr(>Chisq)
a  3 -8.2720 -5.7724 7.1360 -14.272
b  4 -9.3932 -6.0603 8.6966 -17.393 3.1212      1  0.07728 .
---
Signif. codes:  0 '***' 0.001 '**' 0.01 '*' 0.05 '.' 0.1 ' ' 1
```

**(iv) Biomass (expressed as Basal Area)**

```
a <- lmer(BasalArea~1+(1|landuse))
b <- lmer(BasalArea~landuse+(1|landuse))

> anova(a,b)
refitting model(s) with ML (instead of REML)
Data: NULL
Models:
a: BasalArea ~ 1 + (1 | landuse)
b: BasalArea ~ landuse + (1 | landuse)
  Df      AIC      BIC logLik deviance Chisq Chi Df Pr(>Chisq)
a  3 222.66 225.50 -108.33  216.66
b  4 219.11 222.89 -105.56  211.11 5.5525      1  0.01845 *
---
Signif. codes:  0 '***' 0.001 '**' 0.01 '*' 0.05 '.' 0.1 ' ' 1
```

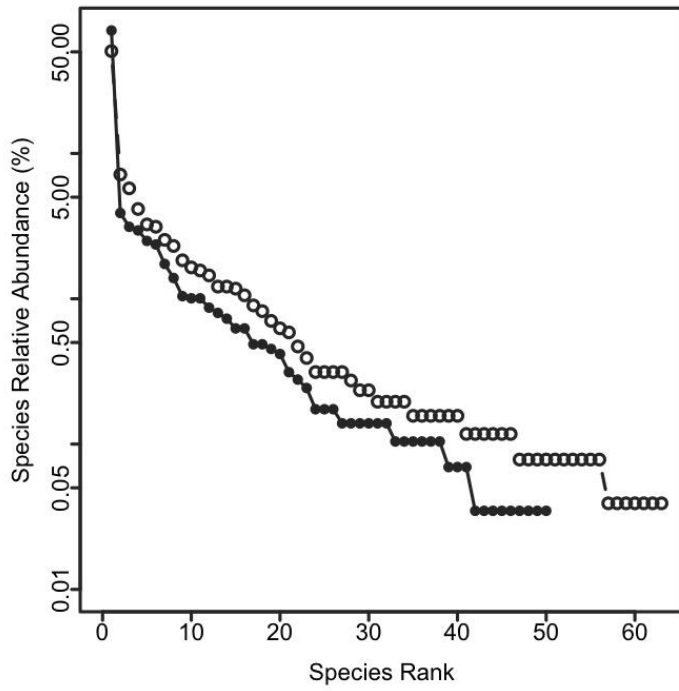

**Fig S1.** Species Rank-Abundance Distributions. Open circles correspond to sacred forests and closed circles to reserve forests

**Table S1.** List of species that occurs in our study sites and the respective presence or absence in sacred forests and reserve forests.

| Species Code | Genus         | Species         | Family         | Authority               | Sacred Forest | Reserve Forest |
|--------------|---------------|-----------------|----------------|-------------------------|---------------|----------------|
| ALBILE       | Albizzia      | lebeck          | FABACEAE       | (L.)Benth.              | Y             | Y              |
| ANOGAC       | Anoigessus    | acuminata       | COMBRETACEAE   | Roxb. ex DC.            | Y             | Y              |
| BRIDRE       | Bridelia      | retusa          | PHYLLANTHACEAE | (L.) Spreng             | Y             | Y              |
| BUCHLA       | Buchanania    | lanzan          | ANACARDIACEAE  | Spreng.                 | Y             | Y              |
| CALLFL       | Callicarpa    | floribunda      | LAMIACEAE      | L.                      | Y             | Y              |
| CAREAR       | Careya        | arborea         | LECYTHIDACEAE  | Roxb.                   | Y             | Y              |
| CASEEL       | Casearia      | elliptica       | SALICACEAE     | Willd.                  | Y             | Y              |
| CASSFI       | Cassia        | fistula         | FABACEAE       | L.                      | Y             | Y              |
| CASSGL       | Cassine       | glauca          | CELASTRACEAE   | (Rottb.) Kuntze         | Y             | Y              |
| CROTRO       | Croton        | roxburghii      | EUPHORBIACEAE  | Balak.                  | Y             | Y              |
| DIOSME       | Diospyros     | melanoxylon     | EBENACEAE      | Roxb.                   | Y             | Y              |
| DIOSMO       | Diospyros     | montana         | EBENACEAE      | Roxb.                   | Y             | Y              |
| DIOSSY       | Diospyros     | sylvatica       | EBENACEAE      | Roxb.                   | Y             | Y              |
| FICUBE       | Ficus         | benghalensis    | MORACEAE       | L.                      | Y             | Y              |
| FLACRA       | Flacourtia    | ramontchi       | SALICACEAE     | (Burm .f. ) Merr.       | Y             | Y              |
| GLOCVE       | Glochidion    | velutinum       | EUPHORBIACEAE  | Wight                   | Y             | Y              |
| HALDCO       | Haldinia      | cordifolia      | RUBIACEAE      | (Roxb.) Ridsdale        | Y             | Y              |
| HOLAAT       | Holarrhena    | antidysenterica | APOCYANACEAE   | (Linn.)                 | Y             | Y              |
| LAGEPA       | Lagerstroemia | parviflora      | LYTHRACEAE     | Roxb.                   | Y             | Y              |
| LANNCO       | Lanea         | coromandelica   | ANACARDIACEAE  | (Houtt.) Merr.          | Y             | Y              |
| MADHIN       | Madhuca       | indica          | SAPOTACEAE     | J.F. Gmel               | Y             | Y              |
| MALLPH       | Mallotus      | philippensis    | EUPHORBIACEAE  | (Lam.) Muell.Arg        | Y             | Y              |
| MANGIN       | Mangifera     | indica          | ANACARDIACEAE  | L.                      | Y             | Y              |
| MORITI       | Morinda       | tinctoria       | RUBIACEAE      | Roxb.                   | Y             | Y              |
| PHYLEM       | Phyllanthus   | emblica         | PHYLLANTHACEAE | L.                      | Y             | Y              |
| PONGPI       | Pongamia      | pinnata         | FABACEAE       | (L.) Pierre             | Y             | Y              |
| PROTSE       | Protium       | serratum        | BURSERACEAE    | (Wall.ex Colebr.) Engl. | Y             | Y              |

|        |               |              |                  |                             |   |   |
|--------|---------------|--------------|------------------|-----------------------------|---|---|
| PTERMA | Pterocarpus   | marsupium    | DIPTEROCARPACEAE | f.                          | Y | Y |
| SCHLOL | Scleichera    | oleosa       | SAPINDACEAE      | (Lour.) Oken                | Y | Y |
| SEMEAN | Semecarpus    | anacardium   | ANACARDIACEAE    | L. f.                       | Y | Y |
| SHORRO | Shorea        | robusta      | DIPTEROCARPACEAE | Gaertn. f.                  | Y | Y |
| STERPE | Stereospermum | personatum   | BIGNONIACEAE     | (Hassk.) Chatterjee         | Y | Y |
| SYMPRA | Symplocos     | racemosa     | SYMPLOCACEAE     | Jacq.                       | Y | Y |
| SYZYCE | Syzygium      | cerasoides   | MYRTACEAE        | (Roxb.)                     | Y | Y |
| SYZYCU | Syzygium      | cumini       | MYRTACEAE        | (L.) Skeels.                | Y | Y |
| TERMAL | Terminalia    | alata        | COMBRETACEAE     | Heyne ex Roth               | Y | Y |
| TERMBE | Terminalia    | bellirica    | COMBRETACEAE     | (Gaertn. ) Roxb.            | Y | Y |
| TERMCH | Terminalia    | chebula      | COMBRETACEAE     | Retz.                       | Y | Y |
| WENDTI | Wendlandia    | tinctoria    | RUBIACEAE        | (Roxb.) DC                  | Y | Y |
| WOODFR | Woodfordia    | fruticosa    | LYTHRACEAE       | (L.) Kurz                   | Y | Y |
| XYLIXY | Xylia         | xylocarpa    | FABACEAE         | Roxb. Taub.                 | Y | Y |
|        |               |              |                  |                             |   |   |
| ALANSA | Alangium      | salvifolium  | ALANGIACEAE      | (L. f. ) Wangerin           | Y | N |
| ANNOSQ | Annona        | squamosa     | ANNONACEAE       | L.                          | Y | N |
| ANTIGH | Antidesma     | ghaesembilla | PHYLLANTHACEAE   | Gaertn.                     | Y | N |
| APOROC | Aporosa       | octandra     | PHYLLANTHACEAE   | Buch.-Ham-ex D.Don) Vickery | Y | N |
| ARDISO | Ardisia       | solanacea    | PRIMULACEAE      | Roxb.                       | Y | N |
| BENKMA | Benkara       | malabarica   | RUBIACEAE        | (Lam.) Tirveng              | Y | N |
| BOMBCE | Bombax        | ceiba        | MALVACEAE        | L.                          | Y | N |
| BREYVI | Breynia       | vitis        | PHYLLANTHACEAE   | (Burm .f. ) C.E.C.Fischer   | Y | N |
| CANTDI | Canthium      | diococum     | RUBIACEAE        | (Gaertn. )                  | Y | N |
| CORDDI | Cordia        | dichotoma    | BORAGINACEAE     | Forst. f.                   | Y | N |
| DESMOO | Desmodium     | oojeinensis  | FABACEAE         | (Roxb.)                     | Y | N |
| ERYTSU | Erythrina     | suberosa     | FABACEAE         | Roxb.                       | Y | N |
| FICUHI | Ficus         | hispida      | MORACEAE         | L.f.                        | Y | N |
| FICURE | Ficus         | religiosa    | MORACEAE         | Linn.                       | Y | N |
| GARDLA | Gardenia      | latifolia    | RUBIACEAE        | Ait.                        | Y | N |
| GARUPI | Garuga        | pinnata      | BURSERACEAE      | Roxb.                       | Y | N |

|        |               |               |                 |                             |   |   |
|--------|---------------|---------------|-----------------|-----------------------------|---|---|
| GREWTI | Grewia        | tilifolia     | MALVACEAE       | F.Muell .ex Benth.          | Y | N |
| HYMEOR | Hymenodictyon | orixense      | RUBIACEAE       | (Roxb. Mabb.                | Y | N |
| LAGEDI | Lagerstroemia | diflora       | LYTHRACEAE      | L.                          | Y | N |
| MEMEUM | Memecylon     | umbellatum    | MELASTOMATACEAE | Burm.f.                     | Y | N |
| MILIVE | Milium        | velutina      | ANNONACEAE      | (Dunal) Hook.f. and Thomson | Y | N |
| MITRPA | Mitragyna     | parvifolia    | RUBIACEAE       | (Roxb.)Korth                | Y | N |
| NYCTAR | Nyctanthes    | arbor-tristis | OLEACEAE        | L.                          | Y | N |
| OROXIN | Oroxylum      | indicum       | BIGNONIACEAE    | Vent.                       | Y | N |
| STERCH | Stereospermum | chelonoides   | BIGNONIACEAE    | (L. fil. ) DC               | Y | N |
| VITENI | Vitex         | negundo       | LAMIACEAE       | L.                          | Y | N |
| VITEPE | Vitex         | peduncularis  | LAMIACEAE       | Wall.ex Schauer             | Y | N |
|        |               |               |                 |                             |   |   |
| ALSTSC | Alstonia      | scholaris     | APOCYANACEAE    | (L.)R.Br.                   | N | Y |
| BAUHVA | Bauhinia      | vahlii        | FABACEAE        | Wright and Arn.             | N | Y |
| CALLTO | Callicarpa    | tomentosa     | LAMIACEAE       | L.(Murr).                   | N | Y |
| COMBDE | Combretum     | decandrum     | COMBRETACEAE    | Jacq.                       | N | Y |
| LONIRA | Lonicera      | ramiflora     | OLEACEAE        | Wall.                       | N | Y |
| NARICR | Naringi       | crenulata     | RUTACEAE        | (Roxb.) D.H. Nicolson       | N | Y |
| OUGEEO | Ougeinia      | oojeinensis   | FABACEAE        | (Roxb.) Hochr.              | N | Y |
| TECTGR | Tectona       | grandis       | LAMIACEAE       | L.f.                        | N | Y |
